# Supplementary material
Source: PubMed Central journal article supplement (PMC7829495)
Supplement: 41366_2021_747_MOESM1_ESM.pdf [file 41366_2021_747_MOESM1_ESM.pdf]

COVID patients in ICU  
(n=77)

Refused participation (n=1)

Excluded (n=9)

- Chemotherapy (n=3)
- Hematological malignancy (n=2)
- High dose corticosteroids (n=1)
- Hyper IgD syndrome (n=1)
- Kidney transplant (n=1)
- Heart transplant (n=1)

n=67

Non-obese  
n=49

Obese  
n=18
