# Supplementary material
Source: PubMed Central journal article supplement (PMC7829495)
Supplement: 41366_2021_747_MOESM6_ESM.pdf [file 41366_2021_747_MOESM6_ESM.pdf]

**Supplementary Fig. 2. Relationship between BMI and plasma cytokine levels on day of admission to the Intensive Care Unit. (a) IL-8, (b) IL-10, (c) interferon gamma (IFN- $\gamma$ ), (d) monocyte chemoattractant protein (MCP)-1 and (e) IL-1 receptor antagonist (RA).**

R- and p-values were calculated using Spearman correlation.
