# Supplementary material
Source: PubMed Central journal article supplement (PMC7829495)
Supplement: 41366_2021_747_MOESM7_ESM.pdf [file 41366_2021_747_MOESM7_ESM.pdf]

**Supplementary Fig. 3. Laboratory inflammation parameters.** Plasma levels of **(a)** procalcitonin, **(b)** ferritin, and **(c)** d-dimer over time. Data presented as geometric means with 95% confidence intervals. P-values were calculated using mixed-model analysis (time\*group interaction factor). No significant differences on any of the individual timepoints were observed according to Sidak's post-hoc multiple comparisons tests.
