# Supplementary material
Source: PubMed Central journal article supplement (PMC7829495)

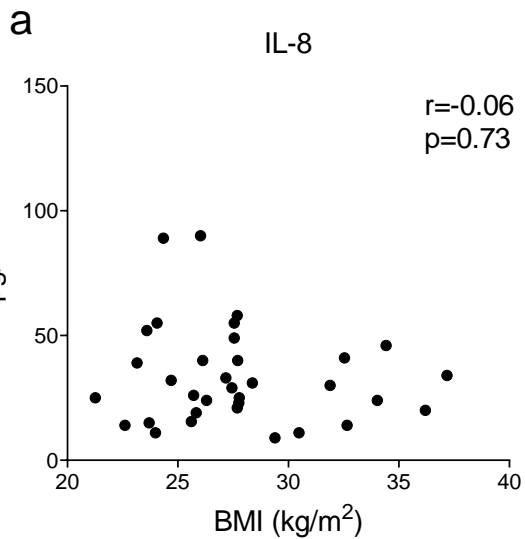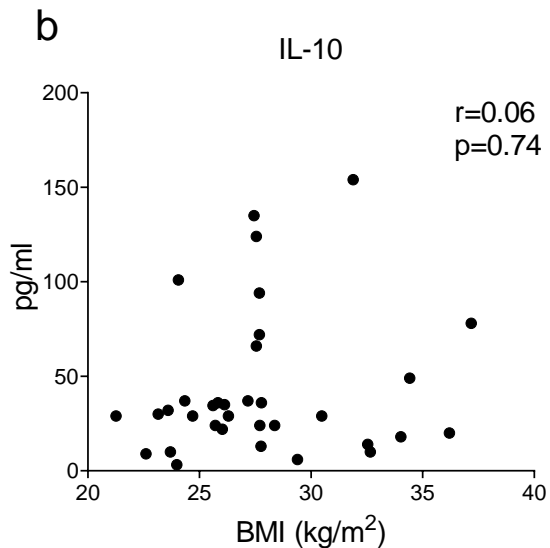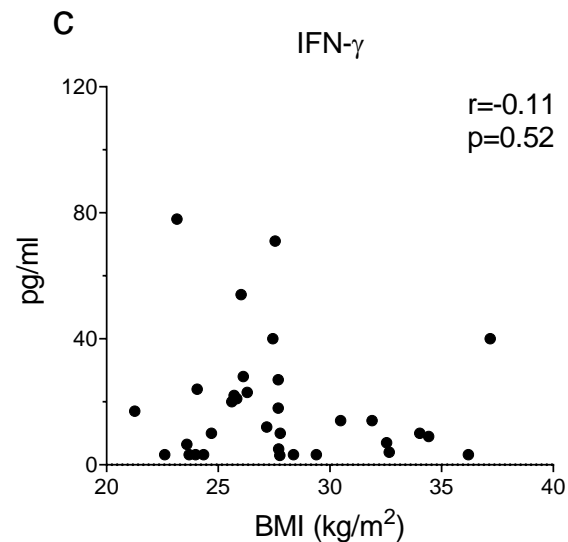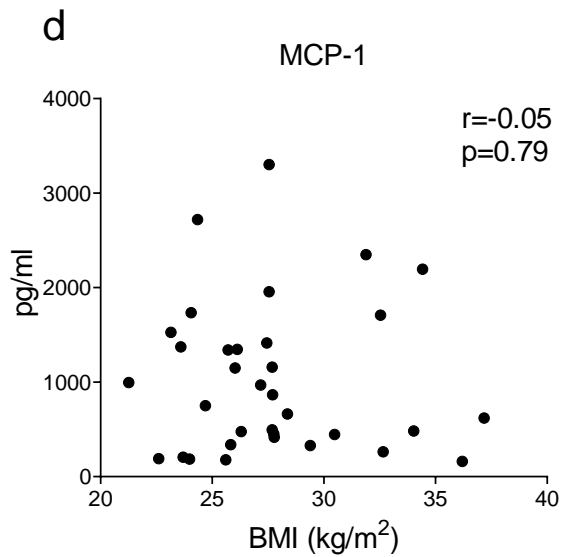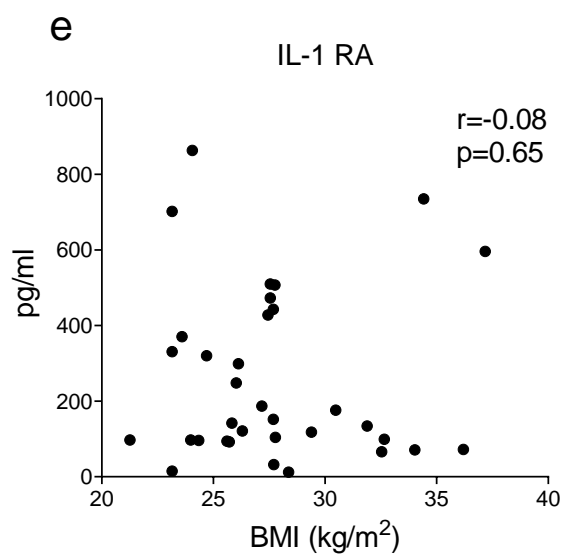

Supplement: 41366_2021_747_MOESM2_ESM.pdf [file 41366_2021_747_MOESM2_ESM.pdf]

▲ Obese ● Non-obese

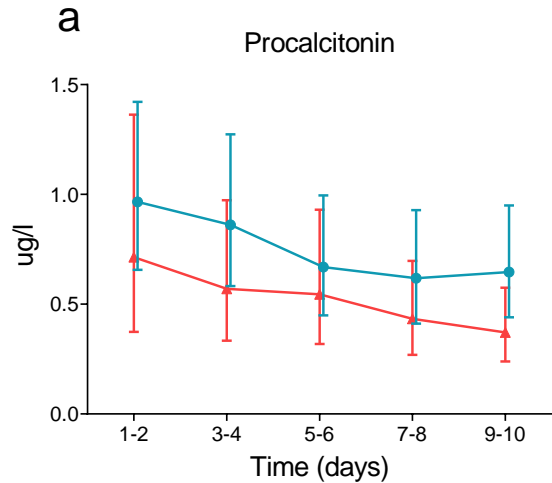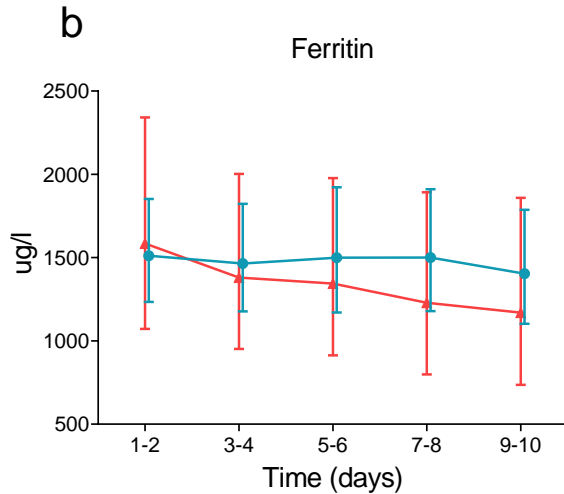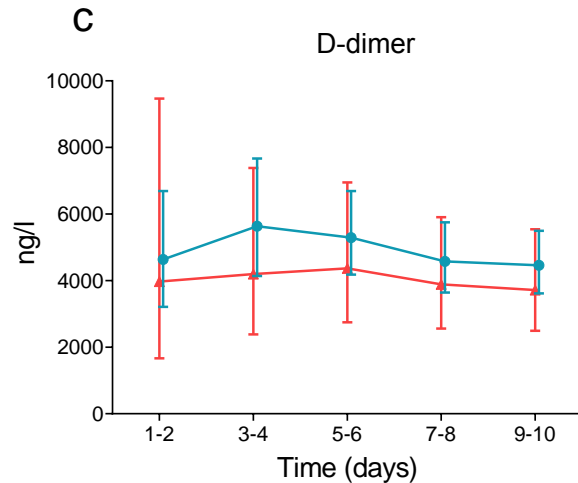

Supplement: 41366_2021_747_MOESM3_ESM.pdf [file 41366_2021_747_MOESM3_ESM.pdf]

Obese Non-obese

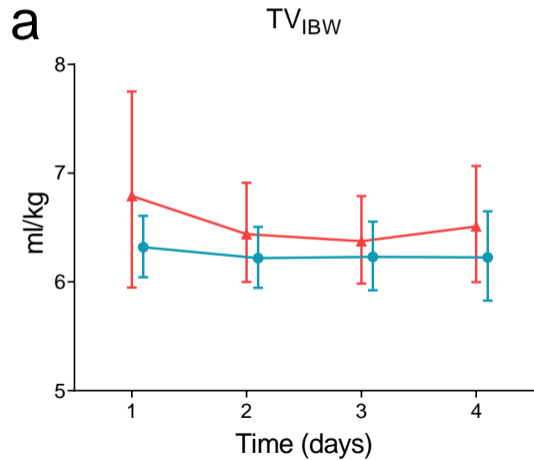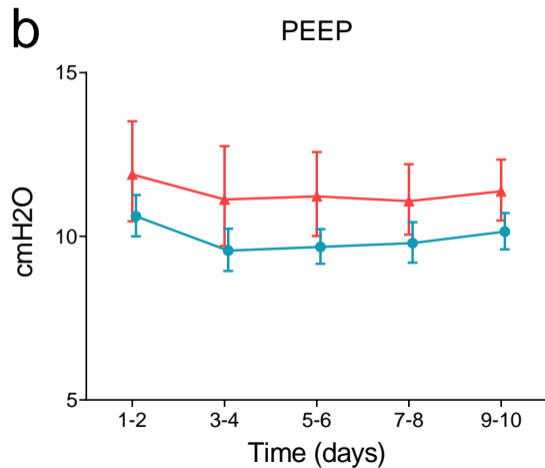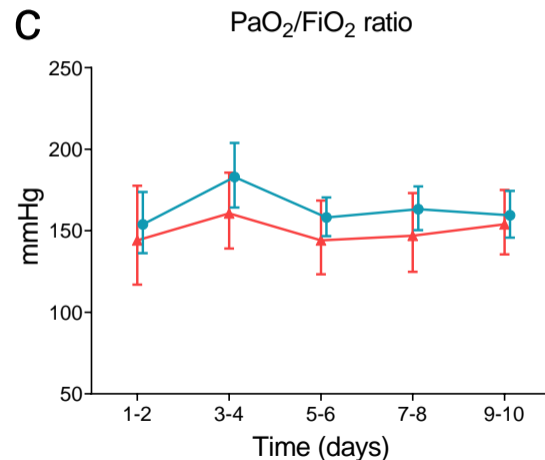

Supplement: 41366_2021_747_MOESM4_ESM.pdf [file 41366_2021_747_MOESM4_ESM.pdf]
